1           **Sharing of heteroplasmies between human liver lobes varies**  
2                                           **across the mtDNA genome**

3  
4   Alexander Hübner<sup>1,§,\*</sup>, Manja Wachsmuth<sup>1,§</sup>, Roland Schröder<sup>1</sup>, Mingkun Li<sup>2</sup>, Anna Maria Eis-  
5   Hübinger<sup>3</sup>, Burkhard Madea<sup>4</sup> and Mark Stoneking<sup>1,\*</sup>

6   <sup>1</sup> Department of Evolutionary Genetics, Max Planck Institute for Evolutionary Anthropology,  
7   Deutscher Platz 6, D-04103 Leipzig, Germany

8   <sup>2</sup>Key Laboratory of Genomic and Precision Medicine, Beijing Institute of Genomics, Chinese  
9   Academy of Sciences, 100101, Beijing, China

10   <sup>3</sup>Institut für Virologie, Universitätsklinikum Bonn, Sigmund-Freud-Str. 25, D-53105 Bonn,  
11   Germany

12   <sup>4</sup>Institut für Rechtsmedizin, Universitätsklinikum Bonn, Stiftsplatz 12, D-53111 Bonn, Germany

13  
14   \* To whom correspondence should be addressed. Tel: +49 (0) 341 3550-504; Email:  
15   stonekg@eva.mpg.de; alexander\_huebner@eva.mpg.de

16   § These authors contributed equally to the manuscript.

17   Keywords: mtDNA, heteroplasmy, liver, sharing

18

## 19 **ABSTRACT**

20 Mitochondrial DNA (mtDNA) heteroplasmy (intra-individual variation) varies among different  
21 human tissues and increases with age, suggesting that the majority of mtDNA heteroplasmies  
22 are acquired, rather than inherited. However, the extent to which heteroplasmic sites are  
23 shared across a tissue remains an open question. We therefore investigated heteroplasmy in  
24 two liver samples (one from each primary lobe) from 83 Europeans, sampled at autopsy. Minor  
25 allele frequencies (MAF) at heteroplasmic sites were significantly correlated between the two  
26 liver samples from an individual, with significantly more sharing of heteroplasmic sites in the  
27 control region than in the coding region. We show that this increased sharing for the control  
28 region cannot be explained by recent mutations at just a few specific heteroplasmic sites or  
29 by the possible presence of 7S DNA. Moreover, we carried out simulations to show that there  
30 is significantly more sharing than would be predicted from random genetic drift from a common  
31 progenitor cell. We also observe a significant excess of non-synonymous vs. synonymous  
32 heteroplasmies in the coding region, but significantly more sharing of synonymous  
33 heteroplasmies. These contrasting patterns for the control vs. the coding region, and for non-  
34 synonymous vs. synonymous heteroplasmies, suggest that selection plays a role in  
35 heteroplasmy sharing.

## 36 **INTRODUCTION**

37 The mitochondrial genome is present in many copies in a single cell, and inter-individual  
38 variation in the mitochondrial genome of an individual is called mtDNA heteroplasmy (Larsson  
39 2010). In humans, it has been shown that detrimental mtDNA mutations are usually present  
40 in a heteroplasmic state at low frequencies, with high frequencies of the deleterious allele  
41 leading to functional defects and a disease phenotype (Larsson 2010; Wallace and Chalkia  
42 2013; Stewart and Chinnery 2015). In addition, heteroplasmy is a general phenomenon in  
43 aging individuals, where the minor allele is present at rather low frequencies (often below 4%)  
44 and many of the affected sites are part of the control region (Stewart and Chinnery 2015). The

45 total number of heteroplasmic sites strongly correlates with age and several studies have  
46 shown that heteroplasmic sites are tissue specific (Michikawa et al. 1999; Calloway et al. 2000;  
47 Wang et al. 2001; Samuels et al. 2013; Li et al. 2015; Naue et al. 2015), i.e. sites which are  
48 frequently heteroplasmic in one tissue are homoplasmic in all other tissues of the same  
49 individual.

50 The tissue specificity of heteroplasmic sites and the association between the number of  
51 heteroplasmies and age would suggest that the majority of heteroplasmies are not inherited  
52 from the previous generation but are acquired during the lifetime of an individual in a tissue-  
53 dependent manner. Therefore, the question arises, whether cells from the same tissue share  
54 a similar profile of heteroplasmic sites despite being separated for many cell divisions? Studies  
55 on mouse embryos containing two different mtDNA haplotypes have shown that mtDNA  
56 segregation occurs rapidly between generations and the distribution of mtDNA haplotypes in  
57 the F1 generation resembles a pattern expected under random genetic drift (Jenuth et al.  
58 1996). This result is expected when the underlying heteroplasmies are evolving neutrally.  
59 However, it has been shown that mtDNA variants do not behave fully neutrally (Nachman et  
60 al. 1996; Jenuth et al. 1997) and more recent studies on human cells indicated that the  
61 observed variance in heteroplasmic levels between cells is less stochastic than expected by  
62 random genetic drift (Raap et al. 2012; Jayaprakash et al. 2015). This suggests that there  
63 might be further population genetic forces, e.g. within-cell mtDNA population structure (Kowald  
64 and Kirkwood 2011) or selection, that shape the distribution of heteroplasmies within as well  
65 as between tissues.

66 While most age-related heteroplasmies occur in the control region, human liver tissue is  
67 unusual in showing an excess of heteroplasmies involving non-synonymous mutations in the  
68 mtDNA protein-coding genes (Li et al. 2015). This result is remarkable because these coding  
69 region mutations are likely to have a functional effect (Li et al. 2015), and coding region  
70 mutations are strongly selected against during transmission from one generation to another  
71 (Stewart et al. 2008). Thus, it seems that mtDNA in human liver tissue exhibits a relaxation of

72 purifying selection and age-related positive selection for somatic mutations that decrease  
73 mitochondrial function (Li et al. 2015). This makes liver a good candidate tissue to analyze the  
74 sharing of heteroplasmic sites with respect to different evolutionary forces.

75 While some studies have investigated the amount of variation in levels of heteroplasmy in cells  
76 that arose from a single ancestor cell in cell culture (Raap et al. 2012; Jayaprakash et al. 2015),  
77 to date there has been no such investigation comparing heteroplasmy across a tissue. We  
78 therefore obtained one blood sample and two liver samples (one from each primary lobe) from  
79 83 Europeans, sampled at autopsy. MtDNA heteroplasmy was evaluated by capture-  
80 enrichment sequencing (Li et al. 2010; Maricic et al. 2010; Li and Stoneking 2012; Li et al.  
81 2015), and we analyzed sharing of mtDNA heteroplasmy between the liver lobes for different  
82 regions of the mitochondrial genome. We find a high correlation in the minor allele frequency  
83 (MAF) at heteroplasmic sites in the control region between the two liver samples, but a much  
84 weaker correlation in the coding region.

85

## 86 **RESULTS**

### 87 **Heteroplasmy sharing within the liver**

88 We investigated mitochondrial DNA heteroplasmy in liver and blood tissue samples of 83  
89 individuals. For liver, two samples taken from different lobes were analyzed in order to  
90 compare the heteroplasmic pattern in different parts of the tissue. The samples were capture-  
91 enriched for mtDNA and sequenced to an average sequencing depth of 1,175-fold for blood  
92 samples and 2,640-fold for liver samples. Applying a threshold of 2.5 % MAF, we detected  
93 541 heteroplasmic sites at 343 different positions (Supplementary Table S1). More  
94 heteroplasmic sites were observed in the coding region for liver (280 sites) compared to blood  
95 (64 sites), but the most abundant heteroplasmic sites in liver were in the control region (site  
96 72: 67 individuals, site 60: 26 individuals, site 94: 20 individuals), which were only rarely  
97 observed in blood (site 72: 1 individual, site 60: 1 individual, site 94: no individuals). These

98 data are in accordance with results from a previous study ((Li et al. 2015), Supplementary  
99 Figure S1), indicating that heteroplasmy is tissue specific, with different individuals exhibiting  
100 similar heteroplasmic patterns.

101 Virological tests revealed that three individuals had active hepatitis B virus infection, one had  
102 active hepatitis C virus infection and one individual was HIV positive, with low viral load  
103 (Supplementary Table S2). Those individuals were kept in all downstream analyses, as the  
104 number of positive cases was too low to analyze separately. There was no effect of liver fat  
105 content on either the total number or the MAFs of heteroplasmic sites (Supplementary Figure  
106 S2,  $p > 0.05$ ) and the mitochondrial DNA copy numbers, estimated for each liver sample as  
107 described before (Wachsmuth et al. 2016), were highly correlated between corresponding liver  
108 samples of an individual, suggesting no functional differences between the liver lobes  
109 (Supplementary Figure S3,  $r = 0.81$ ,  $p < 0.001$ ).

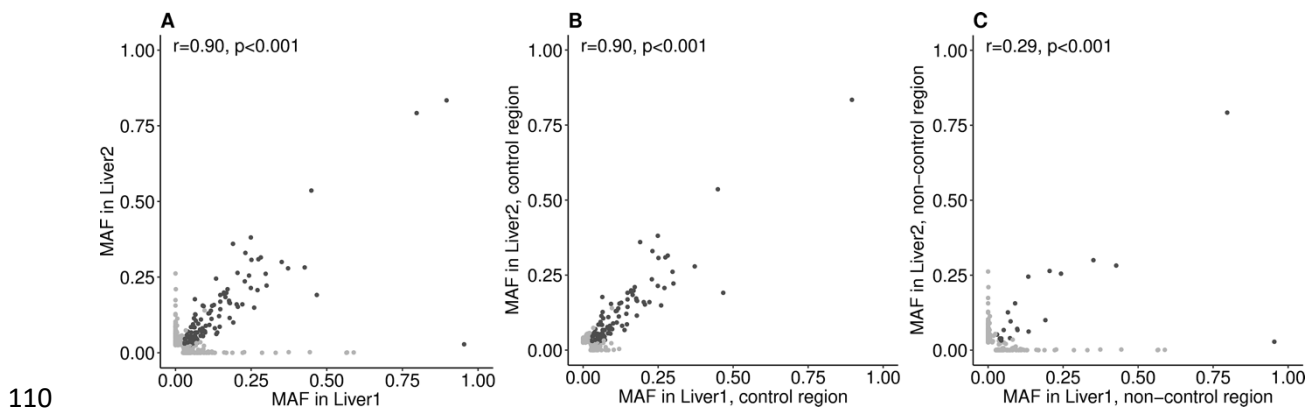

111 **Figure 1: Correlation of MAFs at heteroplasmic sites in liver lobes.** Each dot is one  
112 heteroplasmic site in one individual. Pearson's correlation coefficient  $r$  is given.  
113 Heteroplasmic sites are compared in **A** liver sample 1 and 2, **B** the control region of liver  
114 sample 1 and 2, **C** the non-control region of liver sample 1 and 2. Heteroplasmic sites  
115 shared between liver sample 1 and 2 are in dark grey, non-shared sites in light grey.

116

117 We next asked whether heteroplasmy was correlated between the three different samples  
118 from an individual. For blood and each liver sample, there is a low but significant correlation  
119 ( $r=0.35$  and  $0.38$ ,  $p<0.001$ , Supplementary Figure S4) with only 7.5% of the heteroplasmies  
120 shared between the tissues. However, the correlation between the two liver samples was  
121 higher (Figure 1A,  $r=0.90$ ,  $p<0.001$ ). While 355 sites were heteroplasmic in only one of the  
122 two liver samples of an individual, 136 sites (28%) were heteroplasmic in both liver samples  
123 and these exhibited similar MAFs (Figure 1A). Moreover, there were more shared  
124 heteroplasmies from the control region than from the rest of the genome (Table 1,  $p<0.001$ ):  
125 55% of control region heteroplasmies were shared, vs. 7.5% of heteroplasmies outside the  
126 control region. The high correlation between the MAFs in the two liver samples was mainly  
127 driven by the control region (Figure 1B,  $r=0.90$ ,  $p<0.001$ ), while there was a lower, but still  
128 significant correlation outside the control region (Figure 1C,  $r=0.29$ ,  $p<0.001$ ). The difference  
129 in correlation coefficients is significant, based on random partitions of all of the heteroplasmic  
130 sites into two sets with the same number of sites as observed for the control region and the  
131 non-control region ( $p<0.001$ , Supplementary Figure S5). Thus, not only are more  
132 heteroplasmies shared in the control region than outside the control region, but control region  
133 heteroplasmies also have more similar MAFs.

134 **Table 1:** Heteroplasmic mutations in the control region and the non-control region and shared  
135 and non-shared heteroplasmies.  $p<0.001$  (two-sided Fisher's exact test).

| heteroplasmies in liver1 and liver2 | control region | non-control region | total |
|-------------------------------------|----------------|--------------------|-------|
| shared                              | 115            | 21                 | 136   |
| not shared                          | 95             | 260                | 355   |
| total                               | 210            | 281                |       |

136

137 **Potential mechanisms underlying the more frequent sharing in the control region**

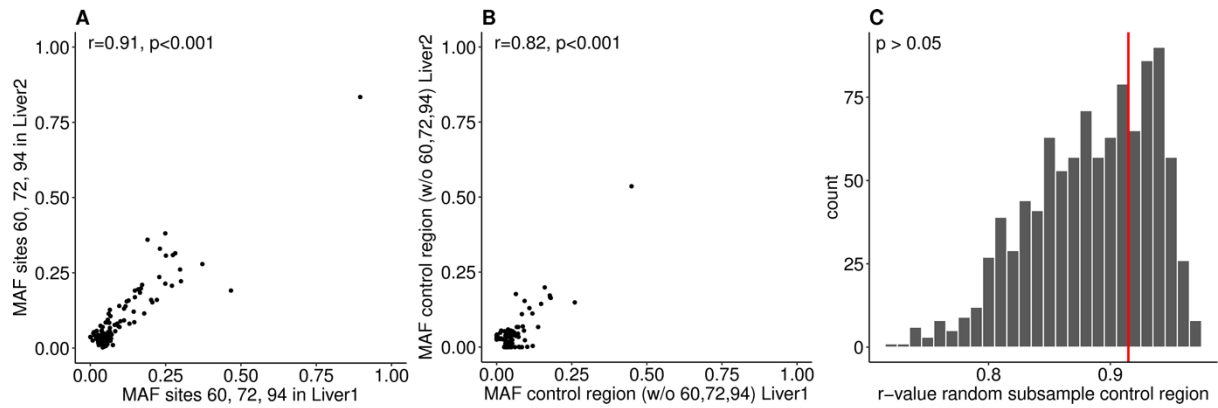

138

139 **Figure 2: Heteroplasmy sharing in liver samples and correlation with single sites. MAFs**

140 per site in liver sample 1 and 2 for: **A** sites 60, 72 and 94; and **B** for all other

141 heteroplasmic sites in the control region. Each dot is one heteroplasmic site in one

142 individual. Pearson's correlation coefficient  $r$  is given. **C** distribution of  $r$ -values for

143 correlation of liver sample 1 and 2 MAFs per site for random subsamples of

144 heteroplasmy in the control region (same number as the sum of sites 60, 72 and 94).

145 The  $r$ -value for sites 60, 72 and 94 only is shown as a red bar.

146

147 *Frequent heteroplasmic sites.* There are three sites that are frequently heteroplasmic in liver

148 (Supplementary Table S1) and all are in the control region (sites 60, 72, and 94). To determine

149 if these three sites are driving the higher correlation in MAF in the control region, we analyzed

150 them separately. While these three sites did indeed show a high correlation in MAF between

151 the two liver samples (Figure 2A,  $r = 0.91$ ,  $p<0.001$ ), the remaining sites in the control region

152 still showed a significant correlation (Figure 2B,  $r=0.82$ ,  $p<0.001$ ) that is higher than the

153 correlation for the non-control region (Figure 1C). To determine if the difference in correlations

154 for the three sites vs. the remaining sites in the control region was statistically significant, we

155 performed a subsampling test. As there were 113 occurrences of heteroplasmy at these three

156 sites, we sampled 113 heteroplasmy at random from the control region, calculated the

157 correlation in MAF between the two liver samples, and repeated this 1000 times. The  $r$ -value

158 for the three sites was not significantly higher than the  $r$ -values for the random subsamples

159 (Figure 2C), indicating that the higher correlation between MAF for the control region than for  
160 the rest of the genome is not driven solely by these three sites.

161 *7S DNA*. The control region includes the D-loop region, in which a third strand, the 7S DNA,  
162 displaces the heavy strand and binds to the light strand. Inferred heteroplasmies in the D-loop  
163 region might therefore reflect mutations in the 7S DNA rather than mutations in the mtDNA  
164 itself. To see if sequences from 7S DNA were likely to be present in the sequencing libraries,  
165 we estimated the relative mtDNA copy number from the capture-enrichment sequencing  
166 coverage of the D-loop region and the rest of the mtDNA molecule separately, as described  
167 before (Wachsmuth et al. 2016). As the 7S DNA has several starting and end points, we used  
168 the outer limits reported in the literature, namely from site 16,097 to site 191 (Roberti et al.  
169 1998; Nicholls and Minczuk 2014). The D-loop did not exhibit a higher copy number than the  
170 other parts of the mtDNA genome, indicating that 7S DNA is unlikely to be present in the DNA  
171 libraries ( $p=0.30$  and  $0.41$  for blood and liver, respectively, Supplementary Figure S6A).  
172 Furthermore, the correlation between the MAF for the two liver samples is almost as high for  
173 the D-loop region as it for the rest of the control region (Supplementary Figure S6 B,C:  $r=0.90$   
174 vs.  $r = 0.89$ ). Hence, the significant correlation in MAFs in the control region is likely a  
175 phenomenon of the entire control region.

176 *Higher mutation rate*. We also tested if heteroplasmic sites showed a higher mutation rate than  
177 non- heteroplasmic sites by comparing the number of heteroplasmies to the inferred mutation  
178 rate at each site, based on observed polymorphism data (Soares et al. 2009). Heteroplasmic  
179 sites had significantly higher mutation rates than sites that were not heteroplasmic ( $p<0.001$ ,  
180 Supplementary Figure S7) with the mutation rate being higher in the control region than  
181 outside the control region. However, mutation rates did not differ between shared vs. non-  
182 shared heteroplasmies ( $p>0.05$ , Supplementary Figure S7), suggesting that the mutation rate  
183 does not increase the probability of heteroplasmies to be shared.



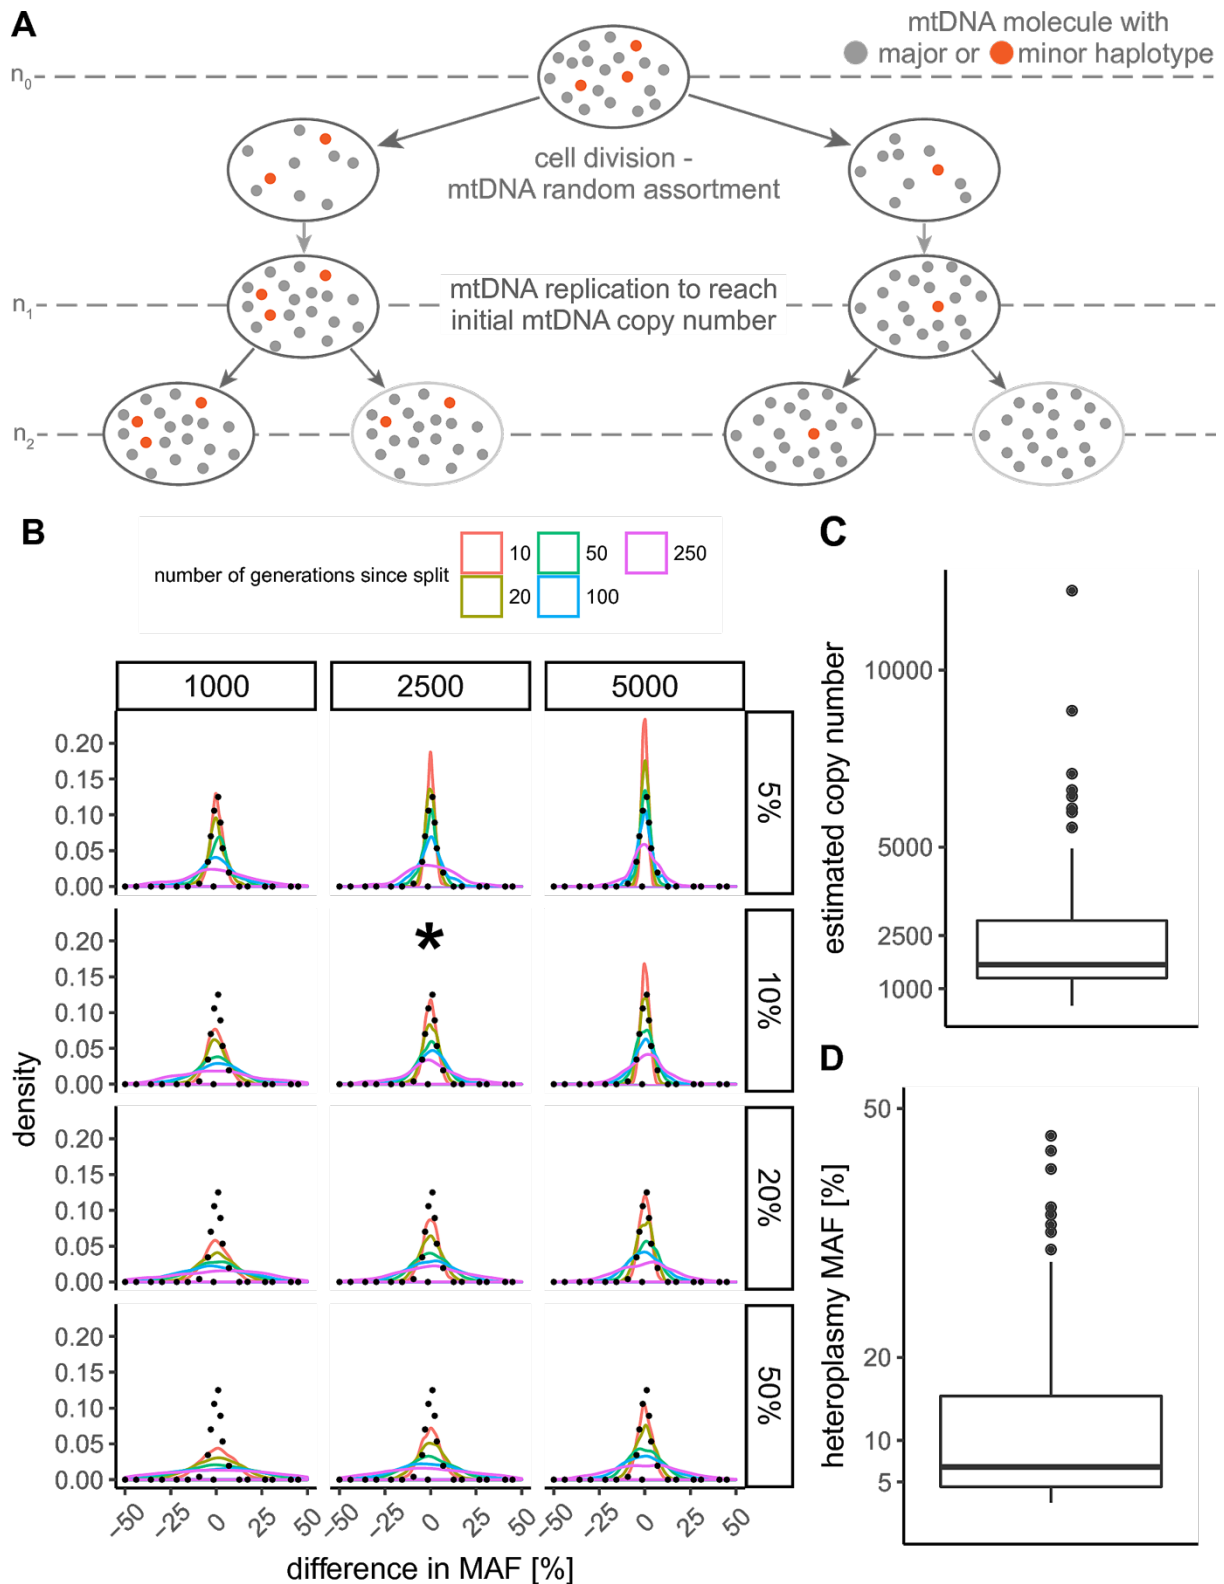

184

185 **Figure 3: Expected difference in minor allele frequency (MAF) assuming random**

186 **genetic drift. A** schematic scheme of the two-step mtDNA replication model used for

187 the simulations: first, all mtDNA molecules are segregated equally into two daughter

188 cells followed by replication step to re-gain the same number of mtDNA copies as in the

189 progenitor cell. After each generation  $n_i$ , the MAF frequency of one random cell on each  
190 site of the pedigree is determined and the MAF difference between the two cells  
191 calculated. **B** expected difference in MAF after 10, 20, 50, 100, and 250 generations  
192 since the split of the two cells. Different mtDNA copy numbers (1,000, 2,500, and 5,000;  
193 kept constant throughout simulation) and initial MAFs (5%, 10%, 20%, and 50%) were  
194 used to simulate random genetic drift between two cells. For each combination of mtDNA  
195 copy number and initial MAF, 1000 replicates were simulated. The black, dotted line  
196 indicates the observed MAF difference between the shared liver heteroplasmies in the  
197 data set. The asterisk highlights the simulation with the parameters closest to the ones  
198 observed in the data set. **C** the mtDNA copy number distribution estimated from the  
199 capture-enriched sequencing data of the liver samples. The values were corrected using  
200 a correction “ratio” of 1/150 (Wachsmuth et al. 2016) to convert the relative to absolute  
201 mtDNA copy numbers. **D** the distribution of MAF in the liver heteroplasmies.

202

203 *Random genetic drift.* If control region heteroplasmies are more likely to have arisen in a  
204 common progenitor cell of the cells sampled in the two liver lobes, then the higher correlation  
205 in MAF might reflect this common ancestry. We therefore tested if the correlation in MAF is  
206 compatible with expected amount of random genetic drift from a common progenitor cell by  
207 simulating mtDNA as a two-step model (Figure 3A) following (Jayaprakash et al. 2015). We  
208 started with different MAFs at the initial generation  $n_0$  (5%, 10%, 20%, 50%) and different  
209 constant mitochondrial DNA copy numbers (1,000, 2,500, and 5,000) and sampled the  
210 difference in MAF 10, 20, 50, 100, and 250 generations after the initial split of the cells (Figure  
211 3B). For all simulations, we observed a higher MAF difference with an increasing number of  
212 cell replications. This effect was more pronounced for higher MAF at generation  $n_0$  and lower  
213 mtDNA copy number. Based on the observed mtDNA copy number (Figure 3C; mean=2,528)  
214 and MAF of shared heteroplasmies with the same consensus allele (Figure 3D; mean=10.8%),  
215 the most similar corresponding simulation is with a copy number of 2,500 and a MAF at

216 generation  $n_0$  of 10%; for this simulation, the variance in observed MAF differences was  
217 smaller than would be expected after 50 generations of random genetic drift (one-sided  $F$ -test  
218 for the equality of two variances,  $p < 0.001$ ). With an increasing number of cell replications, the  
219 simulated MAF difference further diverged from the observed values, which suggests that  
220 random genetic drift cannot explain the observed sharing.

### 221 **Differences in MAF between corresponding liver samples are not correlated with age**

222 We next investigated the influence of age on heteroplasmy sharing between different liver  
223 regions of an individual. Overall, the total number of different heteroplasmic sites in an  
224 individual increased with age for both the control region and the coding region (Supplementary  
225 Figure S8A,  $r = 0.42$  and adjusted  $p < 0.001$  both within and outside of the control region).  
226 However, the MAF at heteroplasmic sites did not increase with age (Supplementary Figure  
227 S8B,  $r = 0.09$  for the control region,  $-0.01$  for outside of the control region, adjusted  $p > 0.05$ ).  
228 Although some heteroplasmies exhibit high MAFs only at ages above 50, many sites remain  
229 at low frequencies even at older ages (Supplementary Figure S8B). The hypothesis that  
230 random genetic drift has an effect on the difference in MAF of two corresponding liver samples  
231 would suggest that with increasing age the difference in MAF would increase, too. Yet, when  
232 testing for a correlation between the difference in MAF between two corresponding liver  
233 samples and age of the individual, we did not observe a significant correlation either within or  
234 outside the control region (Figure 4,  $r = 0.06$  within control region,  $r = -0.01$  outside the control  
235 region, both  $p > 0.05$ ). In order to test whether, in contrast, specific sites have a significant  
236 correlation between the MAF difference and age, we separately calculated the correlation  
237 between MAF difference and age for the three most frequent heteroplasmy sites (sites 60, 72,  
238 and 94), for which at least 20 individuals were heteroplasmic (Supplementary Figure S9). The  
239 correlation between MAF and age was not significant for any of these three sites (adjusted  
240  $p > 0.05$ ), which further supports the hypothesis that the difference in MAF does not increase  
241 with age, contrary to what would be expected from random genetic drift.

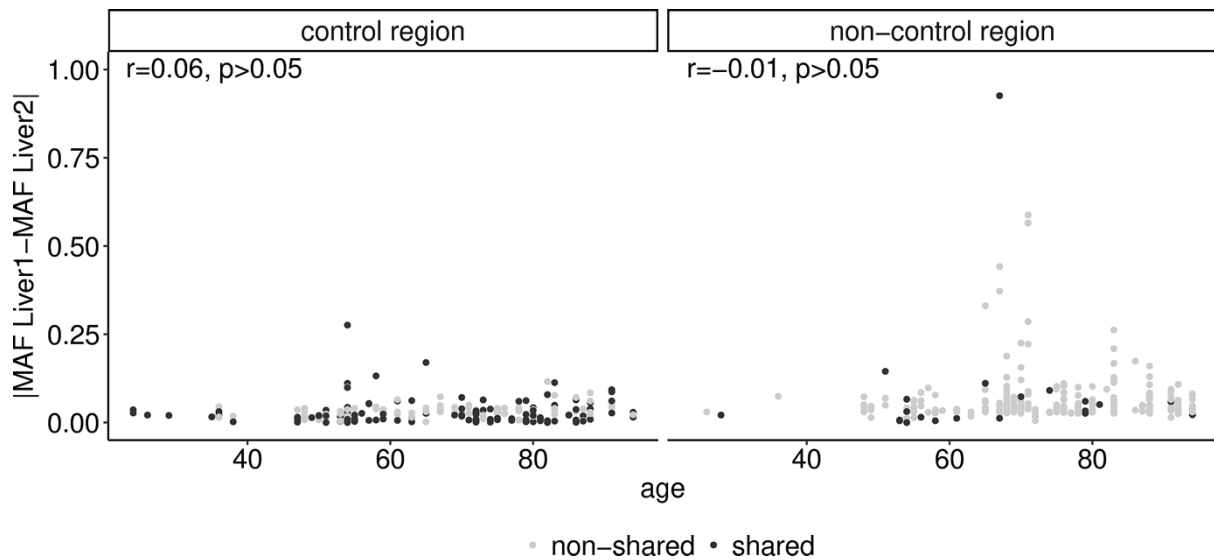

242

243 **Figure 4: Minor allele frequency difference and age.** The difference in minor allele  
244 frequency between liver sample 1 and 2 versus age plotted separately for sites within  
245 and outside the control region. Dark grey dots indicate sites that were shared (i.e.  
246 heteroplasmic in both liver samples from an individual), light grey dots indicate sites that  
247 were not shared.

#### 248 **Synonymous heteroplasmies are more often shared than non-synonymous ones**

249 Previous studies showed that liver has a significant excess of non-synonymous  
250 heteroplasmies which are predicted to have an impact on function (Li et al. 2015). We  
251 investigated this by calculating the ratio of non-synonymous heteroplasmies per non-  
252 synonymous site vs. synonymous heteroplasmies per synonymous site (hN/hS). In the  
253 absence of any selection this ratio has an expected value of 1; purifying selection results in  
254 values less than 1 and positive selection results in values greater than 1. As found previously  
255 (Li et al. 2015), the hN/hS ratio is significantly greater than 1 (adjusted  $p<0.05$ , Supplementary  
256 Figure S10A), indicating positive selection for non-synonymous heteroplasmies rather than  
257 relaxation of functional constraints (Li et al. 2015). Additionally, we observed a strong increase  
258 in the number of heteroplasmies occurring the coding region compared to the control region  
259 in individuals older than 60 years (Supplementary Figure S8A). We, therefore, investigated  
260 whether the excess in non-synonymous heteroplasmies is age-dependent (Supplementary

261 Figure S10B). While both synonymous and non-synonymous heteroplasmies increased in  
262 number with increasing age, only non-synonymous heteroplasmies showed a significant  
263 difference between the age groups below 60 years and above 60 years (two-sided Mann-  
264 Whitney U test, adjusted  $p < 0.05$ ). We then asked if either synonymous or non-synonymous  
265 heteroplasmic sites were more likely to be shared between different liver samples. Although  
266 there were more than twice as many non-synonymous than synonymous heteroplasmies in  
267 the data set (163 vs. 62), there were significantly more synonymous sites shared than non-  
268 synonymous sites (11 vs. 6, Table 2). Accordingly, the median MAF difference between  
269 corresponding liver samples was on average higher for non-synonymous heteroplasmies than  
270 synonymous ones (median MAF difference of 4.4% to 3.8%), albeit not significantly so ( $p > 0.05$ ,  
271 Supplementary Figure S11A). These results suggest that non-synonymous heteroplasmies  
272 more often arise independently in different cells. However, neither non-synonymous nor  
273 synonymous heteroplasmies showed a significant correlation for the difference in MAF  
274 between corresponding liver samples with age ( $p > 0.5$ , Supplementary Figure S11B).

275 **Table 2:** Non-synonymous and synonymous heteroplasmic mutations in the coding region and  
276 shared and non-shared heteroplasmies.  $p < 0.001$  (two-sided Fisher's exact test)

| heteroplasmies in liver1 and liver2 | non-synonymous | synonymous | total |
|-------------------------------------|----------------|------------|-------|
| shared                              | 6              | 11         | 17    |
| not shared                          | 157            | 51         | 208   |
| total                               | 163            | 62         |       |

277

## 278 DISCUSSION

### 279 Heteroplasmies are shared across liver lobes

280 In this study, we compared mtDNA heteroplasmy patterns in samples collected from the two  
281 primary liver lobes of 83 individuals sampled at autopsy and found a significant correlation in  
282 heteroplasmy MAF between the two liver samples from an individual. Moreover, if sites are  
283 heteroplasmic in both liver samples of an individual, the MAFs at those sites tend to be similar

284 independent of age. Previous studies found similar correlations in MAF between cell colonies  
285 derived from single cells and grown in culture (Raap et al. 2012; Jayaprakash et al. 2015), so  
286 our results extend these findings to different parts of the same organ within living individuals.  
287 In addition, we analyzed patterns of heteroplasmy sharing and MAF correlation across  
288 different parts of the mtDNA genome, which provide further information concerning the  
289 potential mechanism(s) behind these observations. In particular, we found significantly more  
290 sharing of heteroplasmic sites and higher MAF correlations for the control region than for the  
291 rest of the genome. We showed that these differences are not due to the presence of 7S DNA,  
292 nor are they driven by just a few sites. Moreover, within the coding region, we found  
293 significantly more sharing of heteroplasmies and higher MAF correlations at synonymous sites  
294 than at nonsynonymous sites.

295 These observations allow us to evaluate several potential explanations for this heteroplasmy  
296 sharing within liver. First, a trivial potential explanation is that a heteroplasmy could appear to  
297 be shared between liver lobes when it is actually present in blood. About 1 liter of blood per  
298 minute flows through the blood vessels of the liver (Wynne et al. 1989), so the DNA from the  
299 liver samples also contains DNA arising from blood cells. Heteroplasmies present in the blood  
300 cells could therefore be detected as heteroplasmies in the liver samples and hence seem to  
301 be shared across lobes. There are  $\sim 10^{10}$  liver cells in 10 g of liver tissue and  $5 \times 10^{10}$  blood  
302 cells in 10 ml of blood (Sender et al. 2016), and in liver autopsy samples there is approximately  
303 10 ml blood per 100 g of tissue (Greenway and Stark 1971). The ratio of liver to blood cells in  
304 a liver autopsy sample is therefore about 1.8. As we additionally observed for our samples  
305 that the average mitochondrial copy number is five times higher in liver than in blood samples  
306 (Supplementary Figure S6a), the overall ratio of mitochondrial genomes from liver cells to  
307 those from blood cells is approximately 9 to 1. Therefore, a heteroplasmy in blood would need  
308 a MAF of at least 22.5% to be called a heteroplasmy in liver (minimum MAF = 2.5%) when it  
309 was actually totally absent in the liver samples. Only 8 out of the 541 heteroplasmies in blood  
310 have a MAF of  $\geq 22.5\%$ , of which four are shared across blood and both liver lobes

311 (Supplementary Table S1). Moreover, the heteroplasmies that are commonly observed in liver  
312 (at positions 60, 72, and 94) are practically absent from blood; these results rule out  
313 experimental contamination with blood DNA as the primary driver for heteroplasmy sharing  
314 across liver lobes.

315 A second reason for heteroplasmy sharing could be a high mutational pressure for some sites,  
316 with de novo mutations at the same site occurring independently throughout the tissue. If this  
317 was the case, one would expect to see a higher correlation of MAFs for common  
318 heteroplasmic sites, as those would be under high mutational pressure. We showed that this  
319 is not the case for the most common heteroplasmic sites 60, 72, and 94 in the data set (Figure  
320 2), and hence this explanation is unlikely. While we further observed a higher mutation rate  
321 for heteroplasmic sites than for non-heteroplasmic sites (Supplementary Figure S7), there was  
322 no difference in mutation rate between shared and non-shared heteroplasmies, suggesting  
323 that the mutation rate has little impact on heteroplasmy sharing.

324 Third, it has been shown that colonic stem cells with non-synonymous mtDNA mutations can  
325 expand clonally from a few cells and spread throughout a tissue by crypt fission (Greaves et  
326 al. 2006). During this process they retain the same level of mutant DNA on a cellular level.  
327 While a similar mechanism in liver could explain the results presented here, this process would  
328 require a cellular turnover on a huge scale throughout the entire liver, starting from just a few  
329 stem cells. This does not seem very likely, as clonal expansion was shown for single intestinal  
330 crypts only and is supposed to be rather slow (Greaves et al. 2006). Moreover, it is not clear  
331 to what extent liver regeneration is driven by stem cells vs. mature hepatocytes (Grompe 2014).

332 Fourth, heteroplasmy sharing could also derive from a pre-existing, inherited heteroplasmy  
333 (Guo et al. 2013; Payne et al. 2013; Rebolledo-Jaramillo et al. 2014; Li et al. 2015) that  
334 remains at similar frequencies across the tissue because drift (random changes in MAF) is  
335 limited. We tested this possibility, using a simulation scheme from a previous study  
336 (Jayaprakash et al. 2015), with different initial heteroplasmy frequencies, and mtDNA copy  
337 numbers that were kept constant (Berk and Clayton 1974). As expected, we observed a larger

338 variance in MAF between daughter cells with increasing starting MAF and decreasing mtDNA  
339 copy number (Figure 3B). For the simulation results closest to our observed average mtDNA  
340 copy number and average heteroplasmy MAF (2,500 and 10%, Figure 3C-D), the observed  
341 difference in MAF between shared heteroplasms was smaller than would be expected after  
342 random genetic drift acting on 50 mtDNA replication steps. However, more than these 50  
343 mtDNA replication steps are expected to have taken place during the life of an average  
344 individual in our study. Assuming  $3.61 \times 10^{11}$  liver cells in an adult liver (Bianconi et al. 2013),  
345 a total of 39 hepatocyte cell replications (including mtDNA replication) are needed to obtain a  
346 full-size, adult liver from a single hepatocyte cell. After the development stage, the post-mitotic  
347 cells continue to replicate their mtDNA independently of cell replication (“relaxed” replication  
348 (Poovathingal et al. 2009)). The estimated half-life of mtDNA in post-mitotic cells ranges  
349 between 2-10 days (Miwa et al. 2008) and 30-300 days (Poovathingal et al. 2012). Assuming  
350 an mtDNA half-life of 30 days, there would be complete replacement of all mtDNA molecules  
351 of a cell within a year, given a mtDNA copy number of 2,500 per cell, so approximately one  
352 “relaxed” replication cycle occurs within the liver of an adult for every year of age. Thus, for  
353 the age range in our data set of 24 to 94 years, the liver samples would have gone through  
354 about 62 - 132 cell replications prior to sampling, and so the observed difference in MAF in  
355 the liver samples is significantly smaller than expected. Moreover, liver samples accumulated  
356 significantly more heteroplasms with age (Supplementary Figure S8A), further arguing that  
357 shared heteroplasms do not reflect pre-existing, inherited heteroplasms. Also, there was  
358 no significant correlation of MAF difference with age, as would be expected with random  
359 genetic drift. In sum, our results extend to liver tissues the previous observations (Raap et al.  
360 2012; Jayaprakash et al. 2015) that random genetic drift alone cannot explain heteroplasmy  
361 sharing between cells in culture.

362 Finally, an equilibrium of heteroplasmy across an entire tissue could be explained by an  
363 exchange of genetic material from mitochondria between cells. Cells can donate whole  
364 mitochondria to adjacent cells through nanotubes, but this has been suggested for distances



365 up to 100  $\mu$ M only and the exchange is often triggered by functional impairments in the  
366 acceptor cell (Rogers and Bhattacharya 2013). An additional way for cells to exchange DNA  
367 material could be the uptake of extracellular DNA material that is either secreted by healthy  
368 cells or is present as the remains of apoptotic cells (van der Vaart and Pretorius 2008). While  
369 the uptake and integration of cell-free nuclear DNA material has been shown (Basak et al.  
370 2016), it is unclear whether cells would also accept mitochondrial DNA. However, studies of  
371 heteroplasmy at the single cell level (reviewed in (Yao et al. 2015)) do suggest the possibility  
372 of transfer between cells. Experiments with cell culture mixes of fluorescently labelled cell lines  
373 suggested the exchange of mtDNA between co-cultured partner cell lines, although the  
374 specific mechanism, either transfer of mitochondrial organelles or transfer of free mtDNA,  
375 could not be identified (Jayaprakash et al. 2015). Overall, such intercellular DNA exchange,  
376 followed by incorporation of mtDNA fragments into the mtDNA of the recipient cells, could  
377 account for the significant correlation we observe in MAF between liver lobes.

378 However, other aspects of our data are incompatible with the hypothesis of intercellular DNA  
379 exchange. In particular, intercellular exchange cannot explain the significantly higher number  
380 of shared heteroplasmies and correlation in MAF for the control region vs. the rest of the  
381 genome, unless one postulates that mtDNA fragments arising from the control region are  
382 either exchanged or incorporated between cells more frequently than mtDNA fragments  
383 arising from the rest of the genome. But even then, intercellular exchange cannot explain the  
384 significantly higher number of shared heteroplasmies and correlation in MAF for synonymous  
385 vs. non-synonymous heteroplasmies, as both should be exchanged at the same rate between  
386 cells.

387 Instead, our data suggest that even if intercellular exchange is occurring, selection must be  
388 involved in the sharing of heteroplasmies and correlation in MAF between liver lobes. Several  
389 aspects of the data suggest that selection influences heteroplasmies. In the coding region of  
390 the mtDNA, we observed a significant excess of non-synonymous vs. synonymous  
391 heteroplasmies (Table 2), more so than can be explained by relaxation of functional

392 constraints on non-synonymous mutations. Moreover, the number of non-synonymous  
393 heteroplasmies increased significantly in individuals above 60 years. Overall, these results  
394 strongly suggest positive selection for nonsynonymous heteroplasmies in liver, as found  
395 previously (Li et al. 2015), and possibly reflecting the hypothesis of the “survival of the slowest”  
396 (deGrey 1997), which postulates that mitochondria with reduced respiratory function due to  
397 increasing mutations suffer less degradation from the production of reactive oxygen species  
398 (ROS). Hence, mitochondria that lack these mutations suffer ROS-related damage and are  
399 removed from cells, thereby resulting in an increase in frequency in mtDNAs with non-  
400 synonymous mutations that decrease mitochondrial function.

401 However, our results indicate a more complex role for selection in the different patterns of  
402 heteroplasmy sharing and MAF correlation across different regions of the mtDNA genome, in  
403 keeping with evidence from other studies. In mice and humans, significantly more synonymous  
404 than non-synonymous heteroplasmies are transmitted to the next generation (Stewart et al.  
405 2008; Rebolledo-Jaramillo et al. 2014; Floros et al. 2018), suggesting selection against non-  
406 synonymous heteroplasmies during transmission. The notable tissue-specificity and allele-  
407 specificity of particular heteroplasmic sites in the control region also suggests a role for  
408 positive selection on heteroplasmies during aging (Samuels et al. 2013; Li et al. 2015). The  
409 increasing evidence for both purifying and positive selection acting on heteroplasmic variants  
410 warrants further investigation, particularly into the potential health-related consequences.

## 411 **MATERIAL AND METHODS**

### 412 **Tissue collection and DNA extraction**

413 Blood and liver were sampled at autopsy from 94 individuals (57 males, 37 females, age range:  
414 24-94, mean: 63, median: 63). Two samples were taken from each liver, one from the right  
415 lobe and one from the left lobe. DNA was extracted as previously described (Li et al. 2015).  
416 The collection of samples and the experimental procedures were approved by the Ethics

417 Commissions of the Rheinische Friedrich Wilhelms University Medical Faculty (Lfd. Nr. 097/15)  
418 and the University of Leipzig Medical Faculty (Az. 305-15-24082015).

#### 419 **Virological assays and histological investigation**

420 Human immunodeficiency virus (HIV) RNA and Hepatitis C virus (HCV) RNA concentration in  
421 blood was determined by using the Abbott RealTime<sup>®</sup> HIV-1 and HCV systems and the  
422 m2000sp/m2000rt instruments according to the instructions of the manufacturer. For detection  
423 of Hepatitis B virus (HBV) DNA the Abbott RealTime<sup>®</sup> HBV system was used. The 95% limit  
424 of detection (LOD<sub>95</sub>) of the HIV, HCV and HBV assay was 40 copies/mL, 12 IU/ mL, and 10  
425 IU/ mL, respectively. If inhibitory effects on enzymatic reactions were present (detected via  
426 co-amplification of control RNA or DNA sequences), blood samples were re-tested at dilutions  
427 of 1/5, 1/10, and 1/15 (13 samples (13%) for HIV, 91 (93%) for HCV, and 8 (7%) for HBV load).  
428 For dilution, a plasma donation from a blood donor negative for HIV, HCV, and HBV was used.  
429 Of the diluted samples tested for HIV, one sample was diluted 1/5, nine had to be diluted 1/10,  
430 and two had to be diluted 1/15, lowering the LOD<sub>95</sub> of the assay to 200, 400, and 600,  
431 respectively. In one sample, inhibition could not be eliminated by sample dilution. Of the diluted  
432 samples tested for HCV, one, 78, and two samples were diluted 1/5, 1/10, and 1/15,  
433 respectively, lowering the LOD<sub>95</sub> of the assay to 60, 120, 180 IU/ml, respectively. In 10  
434 additional samples no result could be achieved, even after dilution. Of the diluted samples  
435 tested for HBV load, 3, 2, and 2 samples were diluted 1/5, 1/10, and 1/15, respectively,  
436 lowering the LOD<sub>95</sub> of the assay to 50, 100, and 150 IU/mL, respectively. All other samples  
437 were tested without any dilution.

438 Fat content of the liver was determined by histological investigations and Sudan staining  
439 (Mulisch M 2015). Tissues with <10% hepatocytes including fat droplets were considered low,  
440 10-30% were medium, 31-50% were high fat and >50% were considered adipohepatic.

#### 441 **Illumina library preparation and sequencing**

442 Double-barcoded DNA libraries for sequencing were prepared and capture-enriched for  
443 mtDNA as previously described (Li et al. 2015). DNA was sequenced on the Illumina HiSeq  
444 platform in rapid mode with 95 bp paired-end reads. Bases were called with FreeBis (Renaud  
445 et al. 2013) and reads were subsequently trimmed and merged using leeHom (Renaud et al.  
446 2014).

#### 447 **Heteroplasmy detection**

448 Heteroplasmy was detected according to the DREEP pipeline (Li et al. 2010; Li and Stoneking  
449 2012). First, heteroplasmies were called if: the minor allele frequency (MAF) for the most  
450 frequent minor allele was at least 2.5% on both the forward and reverse strand; the sequencing  
451 depth was at least 500-fold at a candidate site; and there were at least 10 reads supporting  
452 the minor allele on each strand. Additionally, we required a minimum heteroplasmic quality  
453 score of 10 on each strand. In order to discriminate a true heteroplasmy from sequencing error,  
454 the DREEP pipeline compares the minor allele pattern of any inferred heteroplasmic site to a  
455 database that comprises the minor allele patterns at this site from all other individuals in the  
456 study. When the majority of the samples are from a single tissue like liver in this study (two  
457 liver samples and one blood sample per individual), DREEP is prone to considered commonly  
458 heteroplasmic sites as elevated sequencing error and therefore under-estimates the  
459 heteroplasmic quality score for these. Thus, we used the information about commonly  
460 heteroplasmic sites from (Li et al. 2015) to flag these for both blood and liver tissue in this  
461 study, respectively. A site was considered commonly heteroplasmic in a tissue when at least  
462 five individuals were heteroplasmic for it. Based on this criterion, we ignored the heteroplasmic  
463 quality for sites 60, 72, 94, 185, 189, 203, 11,126, 16,093, and 16,126 for liver and 12,705 for  
464 blood and considered a site heteroplasmic if all other criteria were fulfilled. The following  
465 regions were excluded for heteroplasmy analysis: 302-316, 513-526, 566-573, and 16,181-  
466 16,194. We confirmed that all heteroplasmies were within a coverage between 20 % and 200 %  
467 of the average coverage of the sample. In addition, all samples that could have been  
468 contaminated with other samples during library preparation/extraction were removed. To

469 detect such contamination, pairwise comparisons of all liver samples with each other as well  
470 as all blood samples with each other were performed. All three samples of an individual were  
471 removed if all of the following criteria were fulfilled for any pairwise comparison between  
472 individuals across all sites of the mitochondrial genome: 1) for at least 80% of the sites, for  
473 which two samples had different consensus alleles, the minor allele in the recipient sample  
474 was identical to the major allele in the donor sample; 2) the average MAF across these sites  
475 was at least 1%; and 3) at least 60% of all sites in the recipient sample, for which a minor  
476 allele was observed, were identified as heteroplasmies by the DREEP pipeline (Li et al. 2010;  
477 Li and Stoneking 2012). Furthermore, an additional filter for potential contamination was  
478 applied, in which the heteroplasmic sites for each sample were checked to see if five or more  
479 sites could be explained by contamination from another haplogroup. In total, ten individuals  
480 were removed in these contamination filter steps. Finally, we removed a single individual  
481 because its samples had more than 2% of the MT genome below a sequencing depth of 500-  
482 fold, the cut-off for being considered a heteroplasmy, and thus would have had a higher false  
483 negative rate than the other samples. Overall, we retained 83 individuals for the subsequent  
484 analyses. Minor allele frequencies were calculated with respect to the major allele in blood.

#### 485 **Correlation analysis**

486 Statistical analysis was performed using R (<https://www.R-project.org>), with analyses  
487 performed for the entire mtDNA genome and separately for the coding region (577-16,023),  
488 the control region (16,024-576) and the D-loop region (16,097-191). For correlation of MAFs,  
489 we selected only sites that were identified as heteroplasmies and passed our quality filters in  
490 at least one of the tissues. We then compared the MAFs of these heteroplasmies to the MAF  
491 in the other tissues of an individual, even if the site was not detected as a heteroplasmy in the  
492 other tissues. Pearson correlation coefficients were calculated for correlations between MAFs  
493 among samples as well as for correlations with age assuming a two-sided alternative  
494 hypothesis; the significance of the correlation was tested by randomly permuting the data.  
495 Permutation tests were also used to assess the association between specific sites or regions

496 and minor allele sharing between liver lobes; all permutations were carried out 1000 times.  
497 Whenever categorical data were compared (e.g. synonymous vs. non-synonymous sites),  
498 two-sided Mann-Whitney U tests were used to test for significant differences. Fisher's exact  
499 test was used to test for an association of sharing of heteroplasmic sites between liver lobes  
500 for the control region vs. non-control region and for synonymous vs. non-synonymous  
501 heteroplasmies using a two-sided alternative hypothesis. P-values were adjusted for multiple  
502 testing using Benjamini-Hochberg correction (Benjamini and Hochberg 1995) and highlighted  
503 in the text.

#### 504 **Coverage across the mitochondrial genome**

505 We used per-site coverage determined by the *filter\_and\_summary.pl* script of the DREEP  
506 pipeline (Li and Stoneking 2012) for each sample and calculated the average coverage across  
507 the D-loop region and across the rest of the mtDNA genome.

#### 508 **Non-synonymous heteroplasmies**

509 The hN/hS ratio (Li et al. 2015) was calculated by calculating the Ka/Ks ratio using  
510 *KaKs\_Calculator 2.0* (Wang et al. 2010) between the revised Cambridge Reference Sequence  
511 (rCRS; Andrews, 1999 doi:10.1038/13779) and a mock sequence created by introducing all  
512 minor alleles of heteroplasmies into the coding region of the rCRS. A significance test was  
513 performed by randomly introducing the same substitutions as observed for heteroplasmies at  
514 any site of the coding region of rCRS and calculating the hN/hS ratio in comparison to the non-  
515 altered rCRS.

516 The potential functional impact of non-synonymous heteroplasmies was analyzed by  
517 overlapping the position of the heteroplasmy and its minor allele with the MitImpact database  
518 (Castellana et al. 2015) and comparing the *MutationAssessor* (Reva et al. 2011) score.

519

## 520 DATA ACCESS

521 The raw sequencing data have been deposited with the European Nucleotide Archive under  
522 accession number PRJEB27731. The scripts for heteroplasmy detection and filtering can be  
523 found at <http://dmcrop.sourceforge.net/> and [https://github.com/alexhbnr/liverlobes](https://github.com/alexhbnr/liverlobes_heteroplasmy)  
524 `_heteroplasmy`.

## 525 ACKNOWLEDGEMENTS

526 We thank Anne Haubner, Antje Weihmann, Barbara Höber and Melanie Grabmüller for  
527 technical support. We thank Enrico Macholdt, Michael Dannemann, and Martin Petr for  
528 valuable discussion. The research was funded by the Max Planck Society

## 529 AUTHOR CONTRIBUTIONS

530 MS, BM, ML, AH and MW designed the study. BM collected the samples. RS performed DNA  
531 isolation and sequencing library preparation, AMEH performed virological assays and BM  
532 performed histological analyses. ML and AH wrote pipeline and executed heteroplasmy  
533 detection, AH and MW performed statistical analyses. AH, MW, AMEH and MS wrote the  
534 manuscript. All authors read and approved the final manuscript.

## 535 DISCLOSURE DECLARATION

536 The authors declare that they have no competing interests.

## 537 REFERENCES

- 538 Basak R, Nair NK, Mitra I. 2016. Evidence for cell-free nucleic acids as continuously arising  
539 endogenous DNA mutagens. *Mutation Research-Fundamental and Molecular*  
540 *Mechanisms of Mutagenesis* **793**: 15-21.
- 541 Benjamini Y, Hochberg Y. 1995. Controlling the false discovery rate - a practical and powerful  
542 approach to multiple testing. *Journal of the Royal Statistical Society Series B-*  
543 *Methodological* **57**: 289-300.
- 544 Berk AJ, Clayton DA. 1974. Mechanism of mitochondrial DNA replication in mouse L-cells:  
545 asynchronous replication of strands, segregation of circular daughter molecules,

- 546 aspects of topology and turnover of an initiation sequence. *Journal of molecular biology*  
547 **86**: 801-824.
- 548 Bianconi E, Piovesan A, Facchin F, Beraudi A, Casadei R, Frabetti F, Vitale L, Pelleri MC,  
549 Tassani S, Piva F et al. 2013. An estimation of the number of cells in the human body.  
550 *Annals of human biology* **40**: 463-471.
- 551 Calloway CD, Reynolds RL, Herrin GL, Anderson WW. 2000. The frequency of heteroplasmy  
552 in the HVII region of mtDNA differs across tissue types and increases with age.  
553 *American Journal of Human Genetics* **66**: 1384-1397.
- 554 Castellana S, Ronai J, Mazza T. 2015. MitImpact: an exhaustive collection of pre-computed  
555 pathogenicity predictions of human mitochondrial non-synonymous variants. *Hum*  
556 *Mutat* **36**: E2413-2422.
- 557 deGrey A. 1997. A proposed refinement of the mitochondrial free radical theory of aging.  
558 *Bioessays* **19**: 161-166.
- 559 Floros VI, Pyle A, Dietmann S, Wei W, Tang WWC, Irie N, Payne B, Capalbo A, Noli L,  
560 Coxhead J et al. 2018. Segregation of mitochondrial DNA heteroplasmy through a  
561 developmental genetic bottleneck in human embryos. *Nature cell biology* **20**: 144-144.
- 562 Greaves LC, Preston SL, Tadrous PJ, Taylor RW, Barron MJ, Oukrif D, Leedham SJ,  
563 Deheragoda M, Sasieni P, Novelli MR et al. 2006. Mitochondrial DNA mutations are  
564 established in human colonic stem cells, and mutated clones expand by crypt fission.  
565 *Proceedings of the National Academy of Sciences of the United States of America* **103**:  
566 714-719.
- 567 Greenway C, Stark R. 1971. Hepatic vascular bed. *Physiological reviews* **51**: 23-65.
- 568 Grompe M. 2014. Liver stem cells, where art thou? *Cell stem cell* **15**: 257-258.
- 569 Guo Y, Li Cl, Sheng QH, Winther JF, Cai QY, Boice JD, Shyr Y. 2013. Very Low-Level  
570 Heteroplasmy mtDNA Variations Are Inherited in Humans. *Journal of Genetics and*  
571 *Genomics* **40**: 607-615.
- 572 Jayaprakash AD, Benson EK, Gone S, Liang R, Shim J, Lambertini L, Toloue MM, Wigler M,  
573 Aaronson SA, Sachidanandam R. 2015. Stable heteroplasmy at the single-cell level is  
574 facilitated by intercellular exchange of mtDNA. *Nucleic Acids Research* **43**: 2177-2187.
- 575 Jenuth JP, Peterson AC, Fu K, Shoubridge EA. 1996. Random genetic drift in the female  
576 germline explains the rapid segregation of mammalian mitochondrial DNA. *Nature*  
577 *genetics* **14**: 146-146.
- 578 Jenuth JP, Peterson AC, Shoubridge EA. 1997. Tissue-specific selection for different mtDNA  
579 genotypes in heteroplasmic mice. *Nature genetics* **16**: 93-93.
- 580 Kowald A, Kirkwood TBL. 2011. Evolution of the mitochondrial fusion--fission cycle and its role  
581 in aging. *Proceedings of the National Academy of Sciences* **108**: 10237-10242.



- 582 Larsson NG. 2010. Somatic mitochondrial DNA mutations in mammalian aging. *Annual review*  
583 *of biochemistry* **79**: 683-706.
- 584 Li M, Schoenberg A, Schaeferd M, Schroeder R, Nasidze I, Stoneking M. 2010. Detecting  
585 Heteroplasmy from High-Throughput Sequencing of Complete Human Mitochondrial  
586 DNA Genomes. *American Journal of Human Genetics* **87**: 237-249.
- 587 Li M, Schroeder R, Ni S, Madea B, Stoneking M. 2015. Extensive tissue-related and allele-  
588 related mtDNA heteroplasmy suggests positive selection for somatic mutations.  
589 *Proceedings of the National Academy of Sciences of the United States of America* **112**:  
590 2491-2496.
- 591 Li M, Stoneking M. 2012. A new approach for detecting low-level mutations in next-generation  
592 sequence data. *Genome Biology* **13**: R34.
- 593 Maricic T, Whitten M, Paeaebo S. 2010. Multiplexed DNA Sequence Capture of Mitochondrial  
594 Genomes Using PCR Products. *Plos One* **5**: e14004.
- 595 Michikawa Y, Mazzucchelli F, Bresolin N, Scarlato G, Attardi G. 1999. Aging-dependent large  
596 accumulation of point mutations in the human mtDNA control region for replication.  
597 *Science* **286**: 774-779.
- 598 Miwa S, Lawless C, Von Zglinicki T. 2008. Mitochondrial turnover in liver is fast in vivo and is  
599 accelerated by dietary restriction: application of a simple dynamic model. *Aging cell* **7**:  
600 920-923.
- 601 Mulisch M WU. 2015. *Romeis - Mikroskopische Technik*. Springer Spektrum, Berlin  
602 Heidelberg.
- 603 Nachman MW, Brown WM, Stoneking M, Aquadro CF. 1996. Nonneutral mitochondrial DNA  
604 variation in humans and chimpanzees. *Genetics* **142**: 953-963.
- 605 Naue J, Horer S, Sanger T, Strobl C, Hatzer-Grubwieser P, Parson W, Lutz-Bonengel S. 2015.  
606 Evidence for frequent and tissue-specific sequence heteroplasmy in human  
607 mitochondrial DNA. *Mitochondrion* **20**: 82-94.
- 608 Nicholls TJ, Minczuk M. 2014. In D-loop: 40 years of mitochondrial 7S DNA. *Experimental*  
609 *Gerontology* **56**: 175-181.
- 610 Payne BAI, Wilson IJ, Yu-Wai-Man P, Coxhead J, Deehan D, Horvath R, Taylor RW, Samuels  
611 DC, Santibanez-Koref M, Chinnery PF. 2013. Universal heteroplasmy of human  
612 mitochondrial DNA. *Human Molecular Genetics* **22**: 384-390.
- 613 Poovathingal SK, Gruber J, Halliwell B, Gunawan R. 2009. Stochastic drift in mitochondrial  
614 DNA point mutations: a novel perspective ex silico. *PLoS computational biology* **5**:  
615 e1000572.
- 616 Poovathingal SK, Gruber J, Lakshmanan L, Halliwell B, Gunawan R. 2012. Is mitochondrial  
617 DNA turnover slower than commonly assumed? *Biogerontology* **13**: 557-564.

- 618 Raap AK, Tafrechi RSJ, van de Rijke FM, Pyle A, Wählby C, Szuhai K, Ravelli RBG, de Co  
619 RFM, Rajasimha HK, Nilsson M et al. 2012. Non-random mtDNA segregation patterns  
620 indicate a metastable heteroplasmic segregation unit in m. 3243A> G cybrid cells.  
621 *PLoS One* **7**: e52080-e52080.
- 622 Rebolledo-Jaramillo B, Su MS-W, Stoler N, McElhoe JA, Dickins B, Blankenberg D,  
623 Korneliussen TS, Chiaromonte F, Nielsen R, Holland MM et al. 2014. Maternal age  
624 effect and severe germ-line bottleneck in the inheritance of human mitochondrial DNA.  
625 *Proceedings of the National Academy of Sciences of the United States of America* **111**:  
626 15474-15479.
- 627 Renaud G, Kircher M, Stenzel U, Kelso J. 2013. freebS: an efficient basecaller with calibrated  
628 quality scores for Illumina sequencers. *Bioinformatics* **29**: 1208-1209.
- 629 Renaud G, Stenzel U, Kelso J. 2014. leeHom: adaptor trimming and merging for Illumina  
630 sequencing reads. *Nucleic Acids Research* **42**: e141.
- 631 Reva B, Antipin Y, Sander C. 2011. Predicting the functional impact of protein mutations:  
632 application to cancer genomics. *Nucleic Acids Res* **39**: e118.
- 633 Roberti M, Musicco C, Polosa PL, Milella F, Gadaleta MN, Cantatore P. 1998. Multiple protein-  
634 binding sites in the TAS-region of human and rat mitochondrial DNA. *Biochemical and*  
635 *Biophysical Research Communications* **243**: 36-40.
- 636 Rogers RS, Bhattacharya J. 2013. When Cells Become Organelle Donors. *Physiology* **28**:  
637 414-422.
- 638 Samuels DC, Li C, Li B, Song Z, Torstenson E, Clay HB, Rokas A, Thornton-Wells TA, Moore  
639 JH, Hughes TM et al. 2013. Recurrent Tissue-Specific mtDNA Mutations Are Common  
640 in Humans. *Plos Genetics* **9**: e1003929.
- 641 Sender R, Fuchs S, Milo R. 2016. Revised estimates for the number of human and bacteria  
642 cells in the body. *PLoS biology* **14**: e1002533.
- 643 Soares P, Ermini L, Thomson N, Mormina M, Rito T, Rohl A, Salas A, Oppenheimer S,  
644 Macaulay V, Richards MB. 2009. Correcting for Purifying Selection: An Improved  
645 Human Mitochondrial Molecular Clock. *American Journal of Human Genetics* **84**: 740-  
646 759.
- 647 Stewart JB, Chinnery PF. 2015. The dynamics of mitochondrial DNA heteroplasmy:  
648 implications for human health and disease. *Nat Rev Genet* **16**: 530-542.
- 649 Stewart JB, Freyer C, Elson JL, Wredenberg A, Cansu Z, Trifunovic A, Larsson N-G. 2008.  
650 Strong purifying selection in transmission of mammalian mitochondrial DNA. *PLoS*  
651 *biology* **6**: e10-e10.
- 652 van der Vaart M, Pretorius PJ. 2008. Circulating DNA - Its origin and fluctuation. In *Circulating*  
653 *Nucleic Acids in Plasma and Serum V*, Vol 1137 (ed. PB Gahan, R Swaminathan), pp.  
654 18-26.

- 655 Wachsmuth M, Huebner A, Li M, Madea B, Stoneking M. 2016. Age-Related and  
656 Heteroplasmy-Related Variation in Human mtDNA Copy Number. *Plos Genetics* **12**:  
657 e1005939.
- 658 Wallace DC, Chalkia D. 2013. Mitochondrial DNA Genetics and the Heteroplasmy Conundrum  
659 in Evolution and Disease. *Cold Spring Harbor Perspectives in Biology* **5**: a021220.
- 660 Wang D, Zhang Y, Zhang Z, Zhu J, Yu J. 2010. KaKs\_Calculator 2.0: a toolkit incorporating  
661 gamma-series methods and sliding window strategies. *Genomics, proteomics &*  
662 *bioinformatics* **8**: 77-80.
- 663 Wang Y, Michikawa Y, Mallidis C, Bai Y, Woodhouse L, Yarasheski KE, Miller CA, Askanas  
664 V, Engel WK, Bhasin S et al. 2001. Muscle-specific mutations accumulate with aging  
665 in critical human mtDNA control sites for replication. *Proceedings of the National*  
666 *Academy of Sciences of the United States of America* **98**: 4022-4027.
- 667 Wynne HA, Cope LH, Mutch E, Rawlins MD, Woodhouse KW, James OF. 1989. The effect of  
668 age upon liver volume and apparent liver blood flow in healthy man. *Hepatology* **9**:  
669 297-301.
- 670 Yao YG, Kajigaya S, Young NS. 2015. Mitochondrial DNA mutations in single human blood  
671 cells. *Mutation Research-Fundamental and Molecular Mechanisms of Mutagenesis*  
672 **779**: 68-77.
- 673
